# Supplementary material for: Presence or Absence of mlr Genes and Nutrient Concentrations Co-Determine the Microcystin Biodegradation Efficiency of a Natural Bacterial Community
Source: PubMed Central journal article supplement (PMC5127115; doi:10.3390/toxins8110318), 2016-11-03
Supplement: toxins-08-00318-s001.pdf [file toxins-08-00318-s001.pdf]

# Supplementary Materials: Presence or Absence of *mlr* Genes and Nutrient Concentrations Co-Determine the Microcystin Biodegradation Efficiency of a Natural Bacterial Community

María Ángeles Lezcano, Jesús Morón-López, Ramsy Agha, Isabel López-Heras, Leonor Nozal, Antonio Quesada and Rehab El-Shehawey

**Table S1.** Average bacterial growth rates ( $\text{mg}\cdot\text{L}^{-1}\cdot\text{h}^{-1}$ ) during MCs degradation in MSM, reservoir water and  $\frac{1}{4}$  R2A medium enriched with 1 mg equivalent MC-LR·L<sup>-1</sup> of total MCs. Errors represent standard errors of two replicates. “n.d.” means not detected.

| Bacterial strains | Average bacterial growth rates ( $\text{mg}\cdot\text{L}^{-1}\cdot\text{h}^{-1}$ ) |                          |                 |
|-------------------|------------------------------------------------------------------------------------|--------------------------|-----------------|
|                   | MSM                                                                                | $\frac{1}{4}$ R2A medium | Reservoir water |
| Control           | n.d.                                                                               | n.d.                     | n.d.            |
| Y2                | n.d.                                                                               | $0.25 \pm 0.01$          | n.d.            |
| 2C20              | n.d.                                                                               | $0.28 \pm 0.00$          | n.d.            |
| IM-1              | n.d.                                                                               | $0.47 \pm 0.00$          | n.d.            |
| IM-2              | n.d.                                                                               | $0.87 \pm 0.06$          | n.d.            |
| IM-3              | n.d.                                                                               | $0.73 \pm 0.04$          | n.d.            |
| IM-4              | n.d.                                                                               | $0.21 \pm 0.01$          | n.d.            |

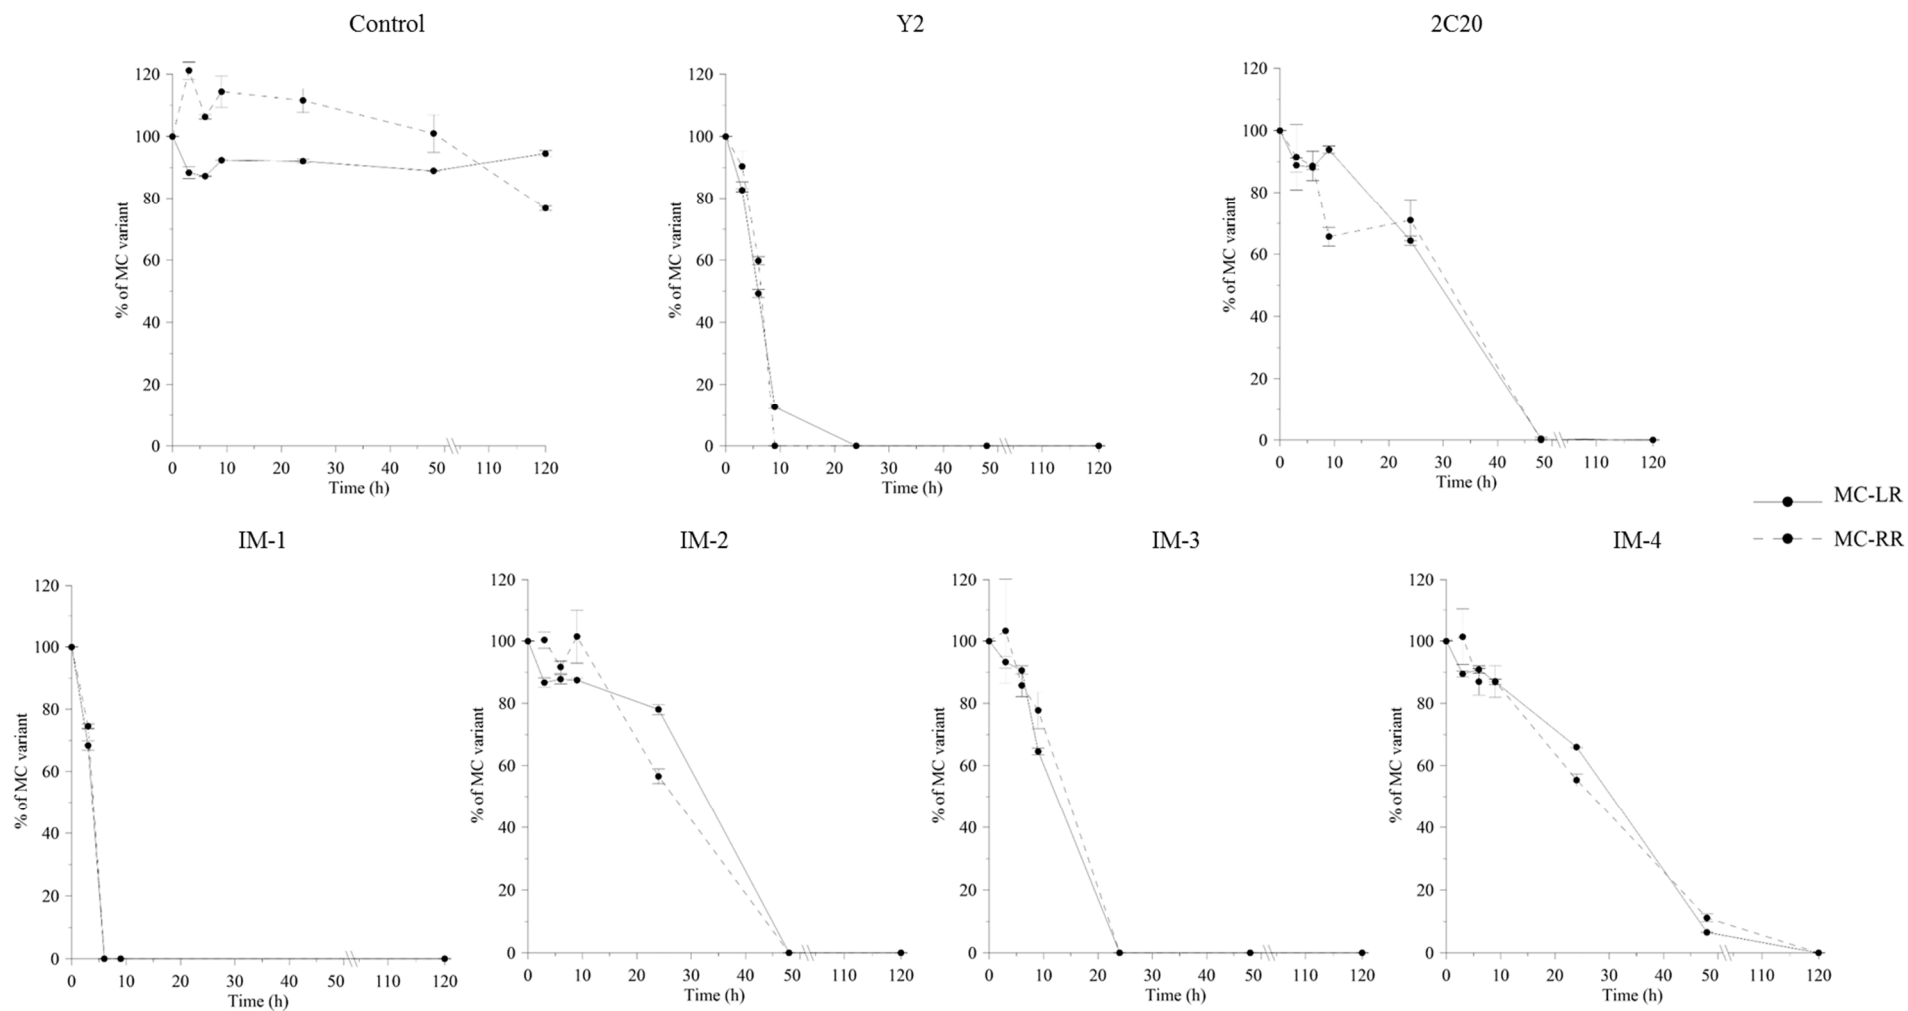

**Figure S1.** Biodegradation of MC-LR and MC-RR variants by bacterial genotypes *mlr*<sup>+</sup> (strains Y2, IM-1, IM2 and IM-3) and *mlr*<sup>-</sup> (strains 2C20 and IM-4) incubated in MSM for 120 h. A negative control without bacteria was included. Error bars represent standard errors of two replicates.

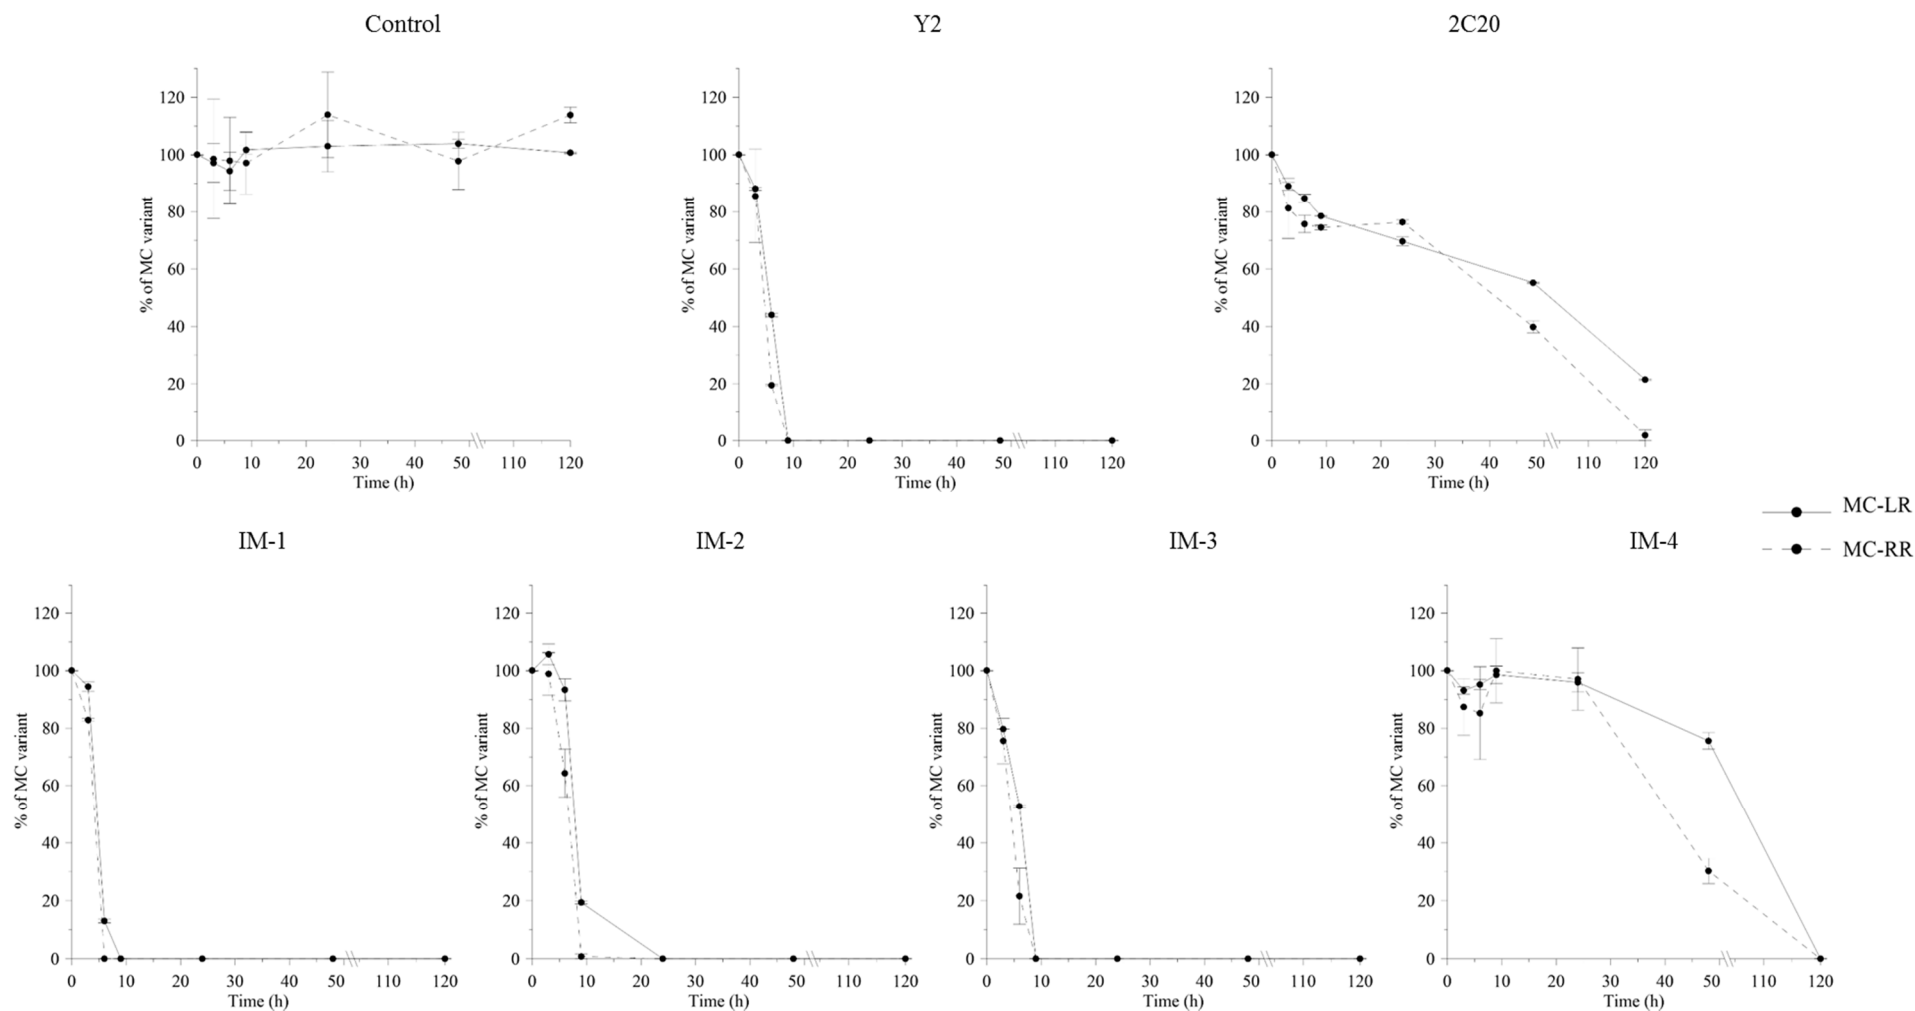

**Figure S2.** Biodegradation of MC-LR and MC-RR variants by bacterial genotypes *mlr*<sup>+</sup> (strains Y2, IM-1, IM2 and IM-3) and *mlr*<sup>-</sup> (strains 2C20 and IM-4) incubated in 1/4 R2A medium for 120 h. A negative control without bacteria was included. Error bars represent standard errors of two replicates.

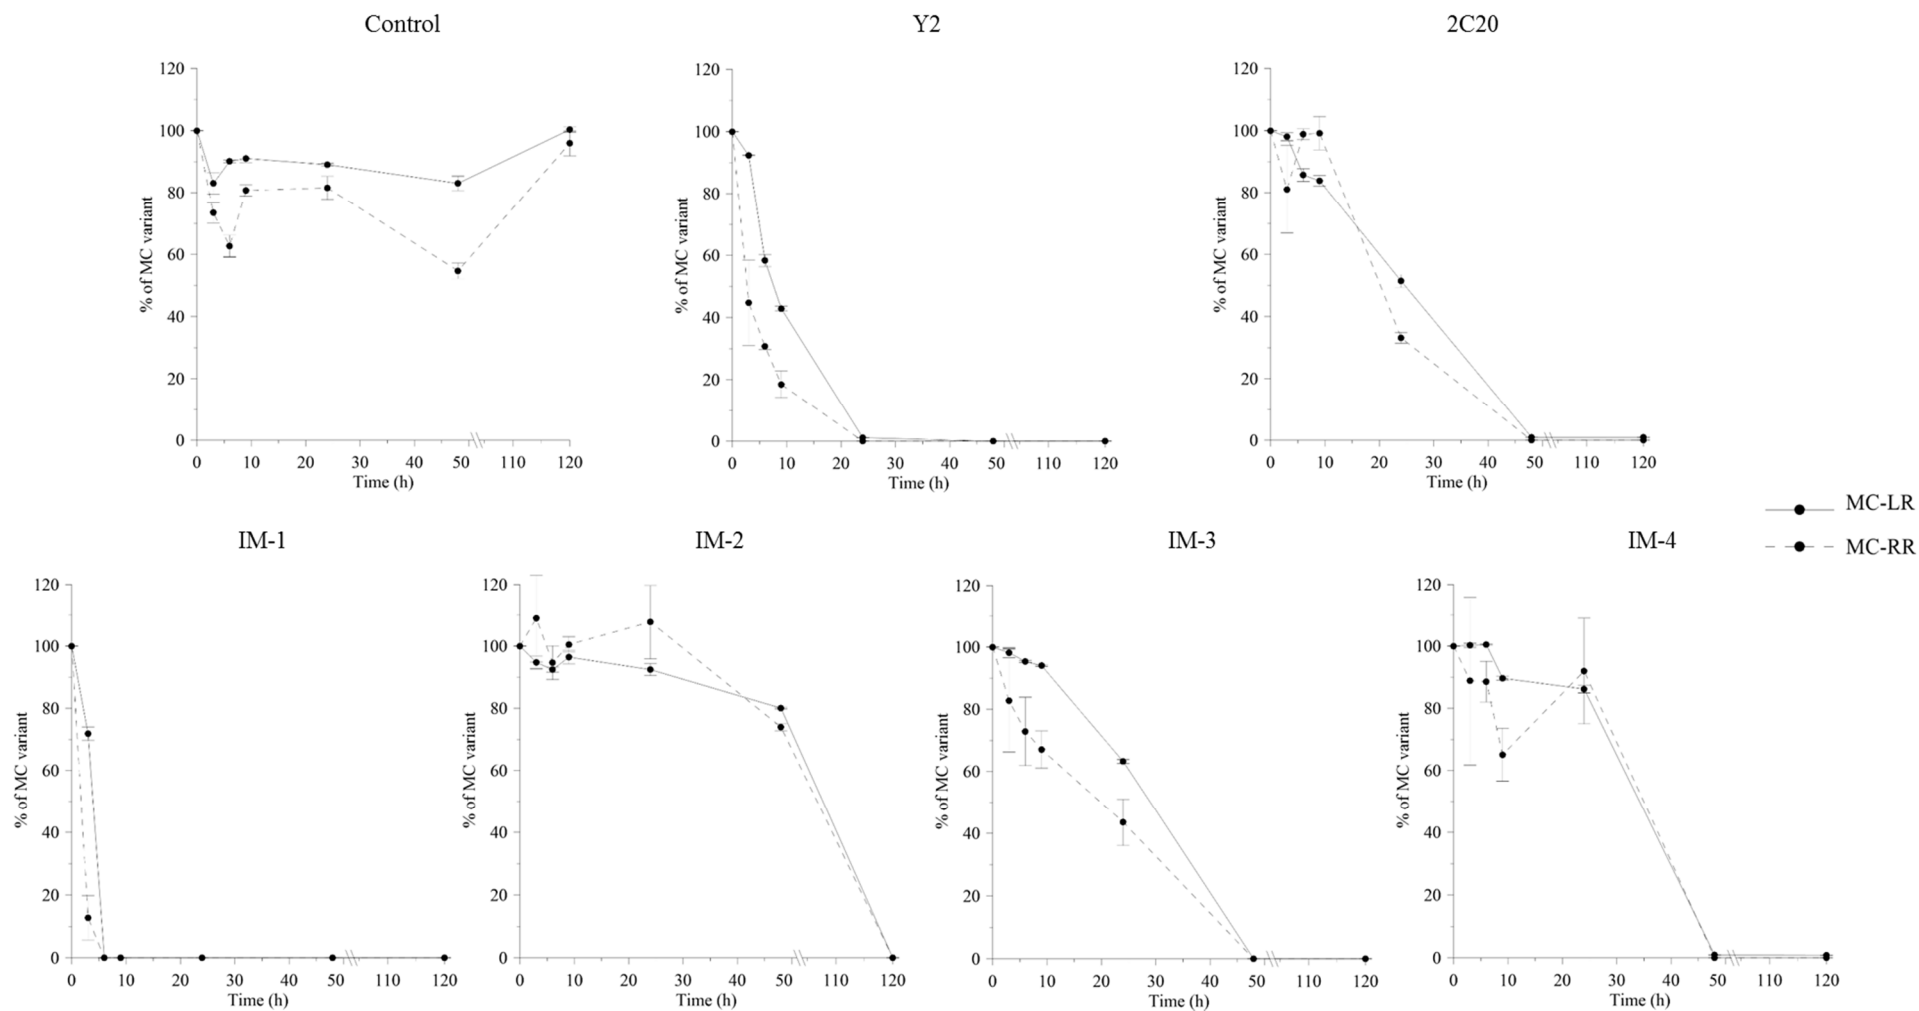

**Figure S3.** Biodegradation of MC-LR and MC-RR variants by bacterial genotypes *mlr*<sup>+</sup> (strains Y2, IM-1, IM2 and IM-3) and *mlr*<sup>-</sup> (strains 2C20 and IM-4) incubated in reservoir water for 120 h. A negative control without bacteria was included. Error bars represent standard errors of two replicates.
